# Supplementary material
Source: PubMed Central journal article supplement (PMC6238050)
Supplement: zam023188877s1.pdf [file zam023188877s1.pdf]

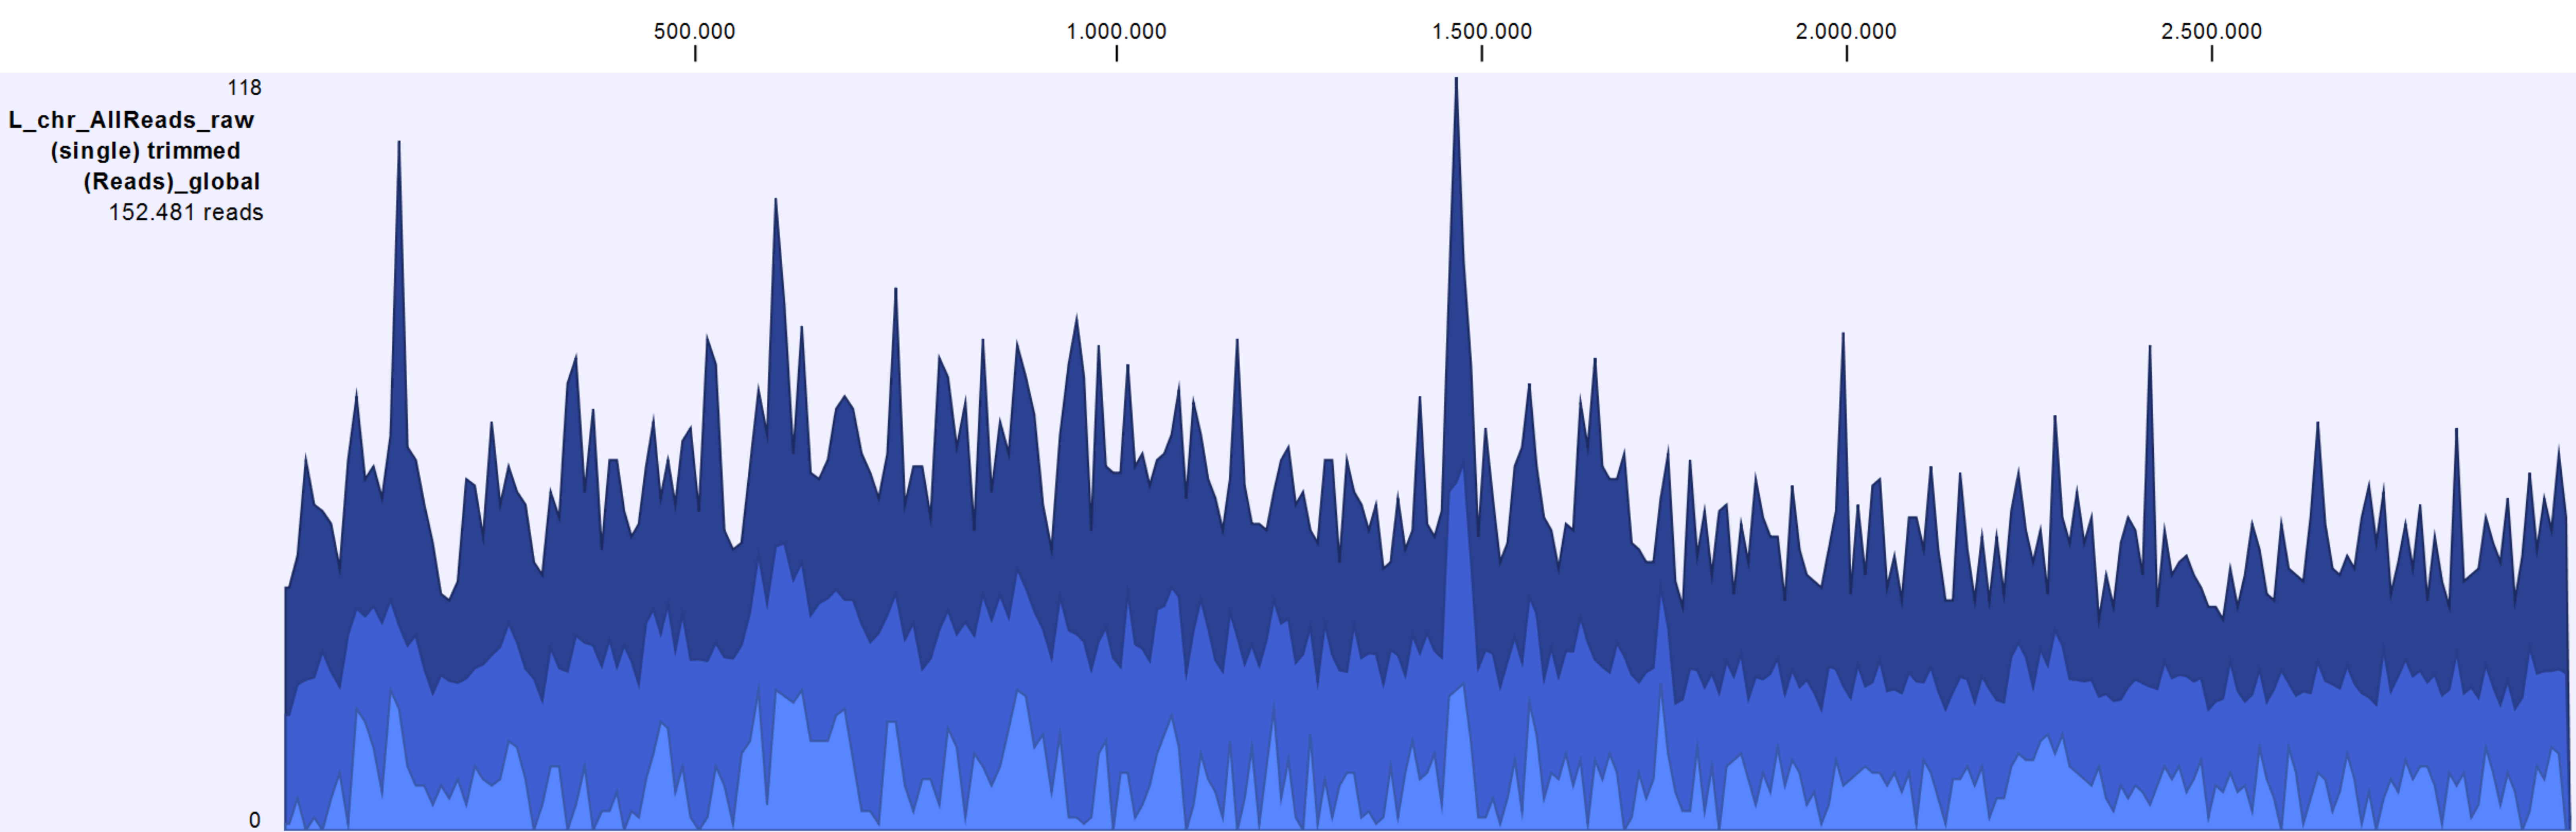

**Fig. S1:** Visualization of global eDNA mapping. eDNA reads generated via 454 sequencing were mapped against the draft genome of *L. chromiiresistens*. This graphical overview shows the coverage of reads against the longest scaffold of the draft genome (representing 97 % of the genome) with different read data aggregations. Reads mapped equally over the whole scaffold. Detailed coverage information can be obtained from Tab. S1. Dark blue, aggregation of 100 bp; blue, aggregation of 1 kb; light blue, aggregation of 10 kb.

a - EDS maps

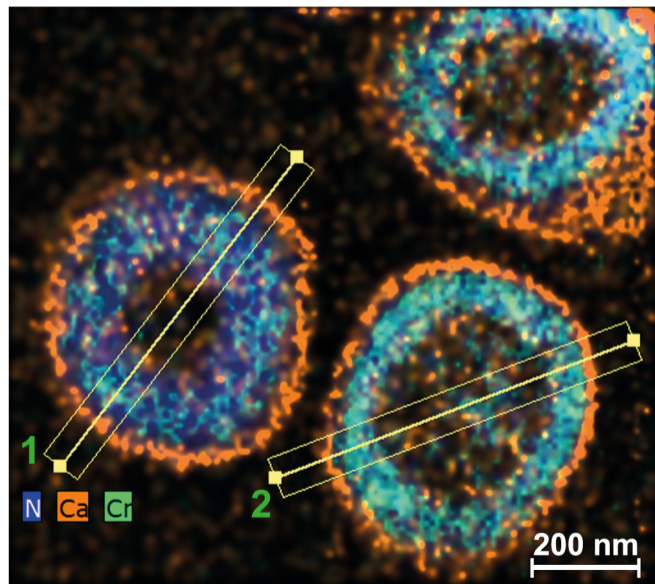

b - path 1

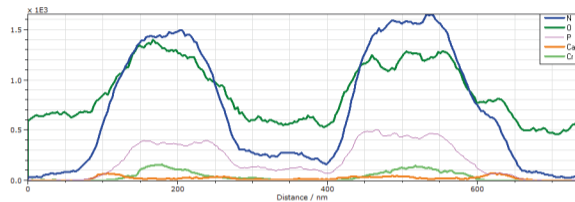

c - path 2

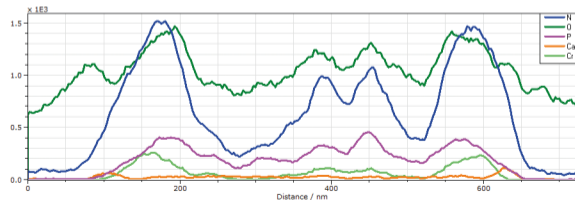

Fig. S2: Superimposed X-ray EDS element (N, Ca, Cr) maps (a) and profiles (b, c) in net counts of the elements along the paths 1 and 2.

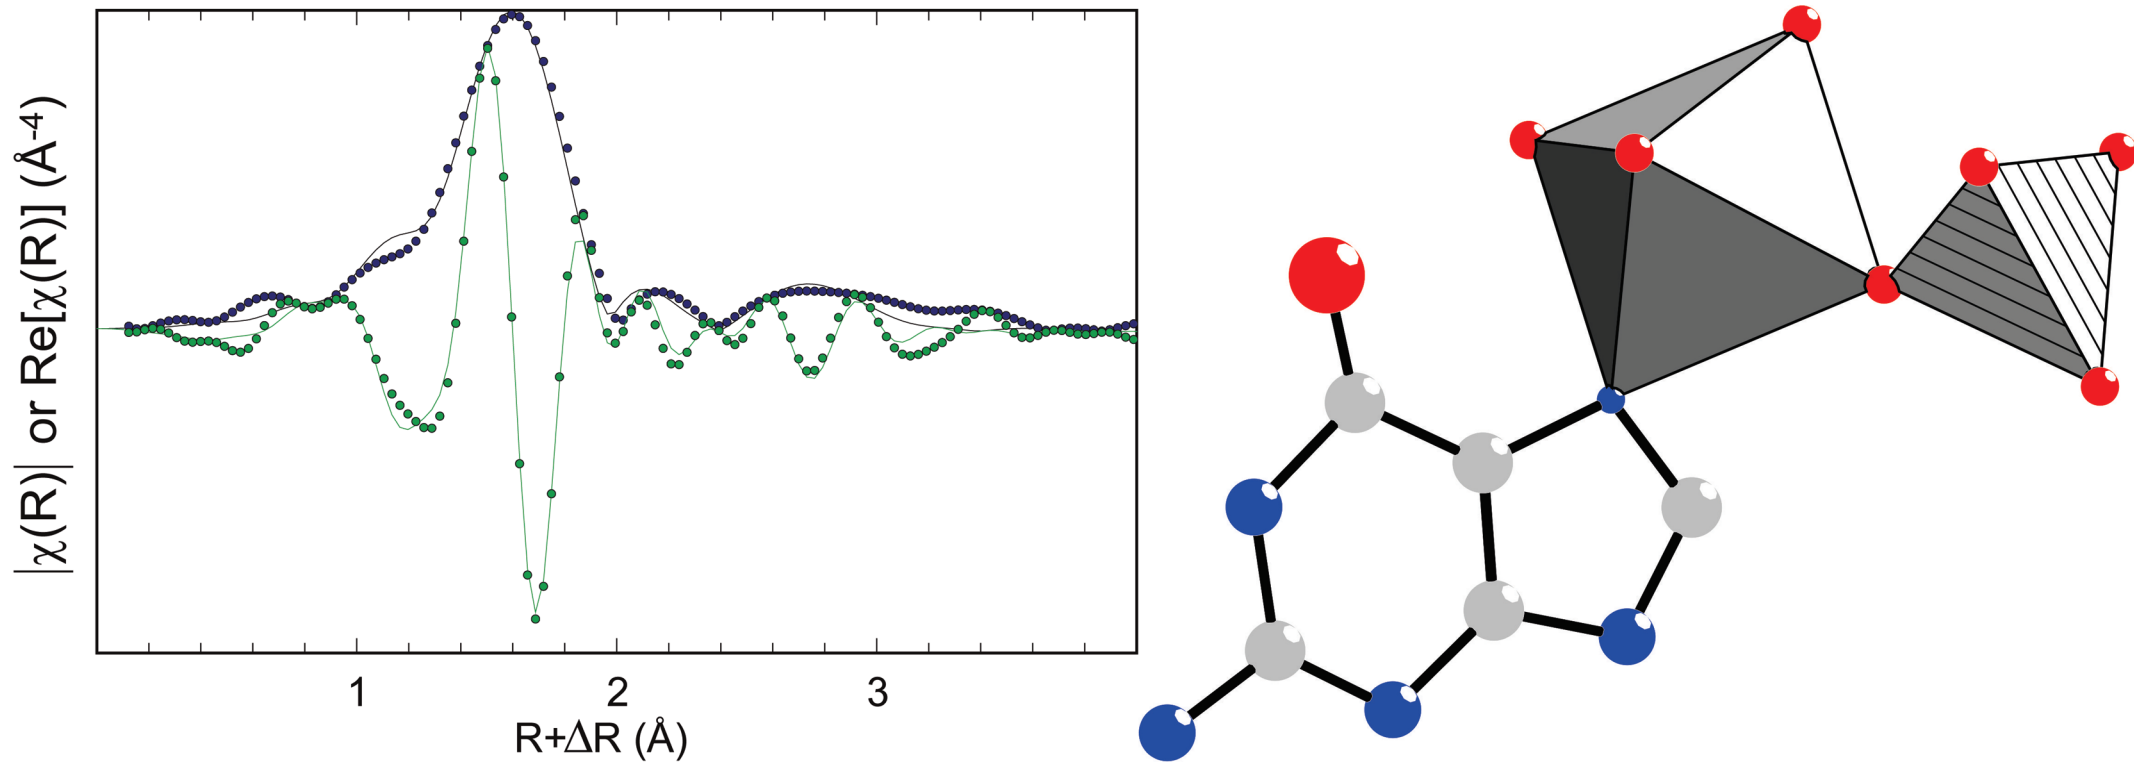

**Fig. S3:** Magnitude (blue) and real part (green) of the Fourier-transformed EXAFS spectrum. Circles represent the measured and reduced data, lines the fit. The fit is based on a configuration shown in the right panel. In this configuration that yielded the best agreement of the fit to the data,  $\text{Cr}^{3+}$  is octahedrally coordinated. The central  $\text{Cr}^{3+}$  is bonded via a bridging oxygen to a phosphate tetrahedron (hatched) and via a bridging nitrogen to a guanine molecule.

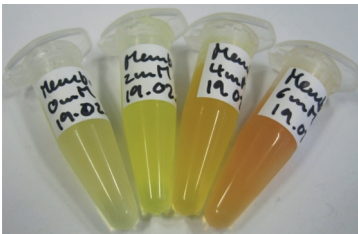

**Fig. S4:** Enhanced pigment production by *L. chromiiresistens* during chromate stress. Membrane fractions of cells grown with 0 mM, 2 mM, 4 mM and 6 mM  $K_2CrO_4$  (left to right).

**Tab. S1:** Global mapping of obtained 454 reads of eDNA sequencing. The average coverage over all contigs is 27-fold. Scaffold00001, representing 97% of the whole *L. chromiiresistens* genome shows a 28-fold coverage. The read coverage throughout all 29 scaffolds suggests a cell lysis-based origin of the eDNA.

| Name                  | Consensus length (bp) | Total read count | Average coverage (x-fold) |
|-----------------------|-----------------------|------------------|---------------------------|
| scaffold00001_mapping | 2990096               | 154937           | 28.21                     |
| scaffold00002_mapping | 5572                  | 277              | 25.71                     |
| scaffold00003_mapping | 5378                  | 1393             | 138.07                    |
| scaffold00004_mapping | 4923                  | 223              | 22.68                     |
| scaffold00005_mapping | 4340                  | 163              | 20.43                     |
| scaffold00006_mapping | 4227                  | 178              | 21.43                     |
| scaffold00007_mapping | 4201                  | 209              | 26.27                     |
| scaffold00008_mapping | 4032                  | 156              | 20.66                     |
| scaffold00009_mapping | 3944                  | 200              | 25.12                     |
| scaffold00010_mapping | 3911                  | 209              | 27.99                     |
| scaffold00011_mapping | 3519                  | 123              | 17.23                     |
| scaffold00012_mapping | 3407                  | 125              | 19.46                     |
| scaffold00013_mapping | 3380                  | 125              | 18.84                     |
| scaffold00014_mapping | 3343                  | 163              | 25.62                     |
| scaffold00015_mapping | 3303                  | 150              | 23.89                     |
| scaffold00016_mapping | 3212                  | 125              | 19.99                     |
| scaffold00017_mapping | 3100                  | 162              | 27.8                      |
| scaffold00018_mapping | 3006                  | 128              | 22.18                     |
| scaffold00019_mapping | 2992                  | 194              | 34.22                     |
| scaffold00020_mapping | 2904                  | 158              | 28.55                     |
| scaffold00021_mapping | 2788                  | 91               | 17.63                     |
| scaffold00022_mapping | 2718                  | 97               | 16.37                     |
| scaffold00023_mapping | 2675                  | 135              | 26.39                     |
| scaffold00024_mapping | 2592                  | 67               | 14.13                     |
| scaffold00025_mapping | 2569                  | 139              | 28.86                     |
| scaffold00026_mapping | 2192                  | 91               | 20.87                     |
| scaffold00027_mapping | 2106                  | 61               | 14.37                     |
| scaffold00028_mapping | 2102                  | 81               | 19.8                      |
| scaffold00029_mapping | 2018                  | 104              | 20.03                     |

**Tab. S2:** Potential factors conferring resistance to chromate and/or other heavy metals. Besides *Leucobacter* common features, the genome of *L. chromiirestiens* harbors unique factors within the *Leucobacter* genus that potentially facilitate chromate resistance.

| Possible resistance factors                 | Position on NZ_JH370377.1 | Locus tag <i>L. chromiirestiens</i> | NCBI RefSeq    |
|---------------------------------------------|---------------------------|-------------------------------------|----------------|
| <b>Common</b>                               |                           |                                     |                |
| Arsenate reductase ArsC                     | 2478357..2478761          | KIE_RS0111130                       | WP_010157043.1 |
| Arsenate reductase ArsC (EC_1.20.4.1)       | 711662..712066            | KIE_RS0103040                       | WP_010155309.1 |
| Arsenical-resistance protein ACR3           | 2476251..2477339          | KIE_RS0111120                       | WP_010157040.1 |
| Cobalt-zinc-cadmium resistance protein CzcD | 725817..726758            | KIE_RS0103120                       | WP_010155327.1 |
| Cobalt-zinc-cadmium resistance protein CzcD | 1018812..1019834          | KIE_RS0104545                       | WP_010155643.1 |
| Copper resistance protein D                 | 1077644..1079644          | KIE_RS0104765                       | WP_010155691.1 |
| Heavy metal translocating P-type ATPase     | 2479764..2481713          | KIE_RS0111145                       | WP_029608311.1 |
| Heavy metal translocating P-type ATPase     | 3191458..3193668          | KIE_RS0114300                       | WP_081473401.1 |
| Heavy metal translocating P-type ATPase     | 719156..721345            | KIE_RS0103085                       | WP_050803159.1 |
| Heavy metal translocating P-type ATPase     | 767529..769499            | KIE_RS0103395                       | WP_010155381.1 |
| Copper resistance protein CopC              | 2440342..2440983          | KIE_RS18150                         | WP_081473334.1 |
| Arsenical resistance operon repressor ArsR  | 2483494..2483835          | KIE_RS0111160                       | WP_010157049.1 |
| Lycopene cyclase domain-containing protein  | 631188..631535            | KIE_RS0102685                       | WP_010155226.1 |
| Lycopene cyclase domain-containing protein  | 631532..631891            | KIE_RS15680                         | WP_010155228.1 |
| Chromate transport protein ChrA             | 2689182..2690411          | KIE_RS0112145                       | WP_010157242.1 |
| Copper chaperone PCu(A)C                    | 2441030..2441587          | KIE_RS0110955                       | WP_010157004.1 |
| Cobald transporter                          | 641245..642243            | KIE_RS0102760                       | WP_010155245.1 |

**Unique**

|                                                            |                |               |                |
|------------------------------------------------------------|----------------|---------------|----------------|
| Cadmium transporter CadD                                   | 745799..746401 | KIE_RS0103250 | WP_010155353.1 |
| Mercuric ion reductase                                     | 755159..756583 | KIE_RS0103325 | WP_010155368.1 |
| Heavy metal-responsive transcriptional regulator HTH-HMRTR | 754665..755054 | KIE_RS0103320 | WP_010155367.1 |
| Mercury transporter TauE                                   | 758102..759022 | KIE_RS0103345 | WP_006947554.1 |
| Organomercurial lyase MerB                                 | 756604..757254 | KIE_RS0103330 | WP_010155369.1 |
| Copper resistance protein CopZ                             | 703929..704285 | KIE_RS17935   | WP_081473297.1 |
